# Supplementary material for: Multi-level inhibition of coronavirus replication by chemical ER stress
Source: PubMed Central journal article supplement (PMC8452654; doi:10.1038/s41467-021-25551-1), 2021-09-20
Supplement: 41467_2021_25551_MOESM1_ESM.pdf [file 41467_2021_25551_MOESM1_ESM.pdf]

## **Supplementary Information**

**Supplementary Fig. 1.** Opposing effects of HCoV-229E or MERS-CoV on ER stress genes at the mRNA and protein level.

**Supplementary Fig. 2.** PERK inhibition by GSK2656157 suppresses CoV replication.

**Supplementary Fig. 3.** Thapsigargin suppresses MERS-CoV and SARS-CoV-2 N protein and upregulates BiP in infected cells.

**Supplementary Fig. 4.** Thapsigargin suppresses Influenza A virus but not poliovirus replication.

**Supplementary Fig. 5.** Comparison of the antiviral effects of thapsigargin and remdesivir.

**Supplementary Fig. 6.** Identification of deregulated cellular pathways in MERS-CoV-infected HuH7 cells.

**Supplementary Fig. 7.** Identification of deregulated cellular pathways in SARS-CoV-2-infected Vero E6 cells.

**Supplementary Fig. 8.** Top pathways regulated by MERS-CoV, SARS-CoV-2 or thapsigargin.

**Supplementary Fig. 9.** Projection of thapsigargin effects on protein levels of pathway KEGG hsa04141.

**Supplementary Fig. 10.** Effects of bafilomycin A<sub>1</sub> on the viability of HCoV-229E-infected and thapsigargin-treated HuH7 cells.

**Supplementary Fig. 11.** Analysis of inflammatory host cell transcripts showing thapsigargin-independent uncoupling of mRNA and protein levels in HCoV-229E-infected cells.

**Supplementary Table 1.** List of all commercial Taqman assays and primers used in this study.

HCov-229E / - (24 h)

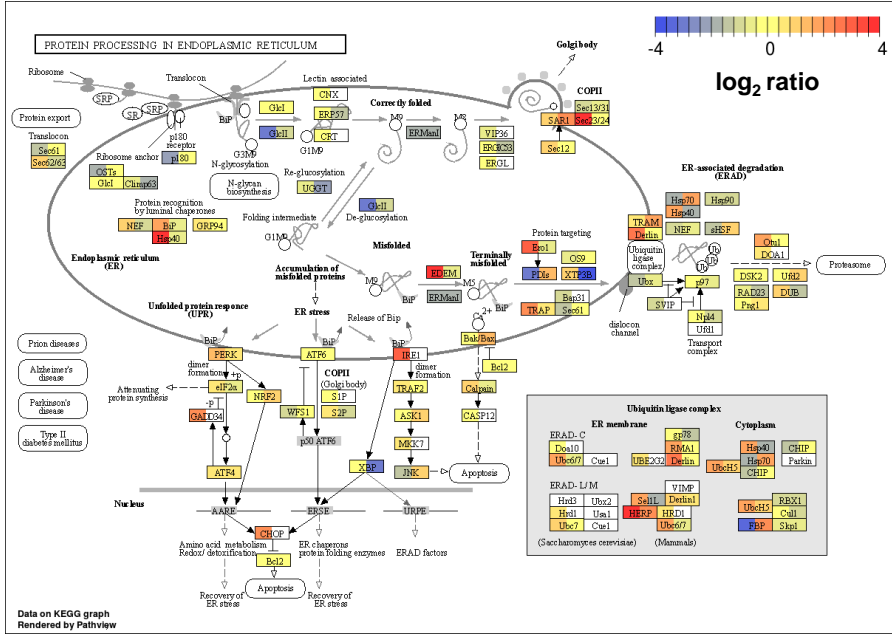

mRNA protein

MERS-CoV / - (24 h)

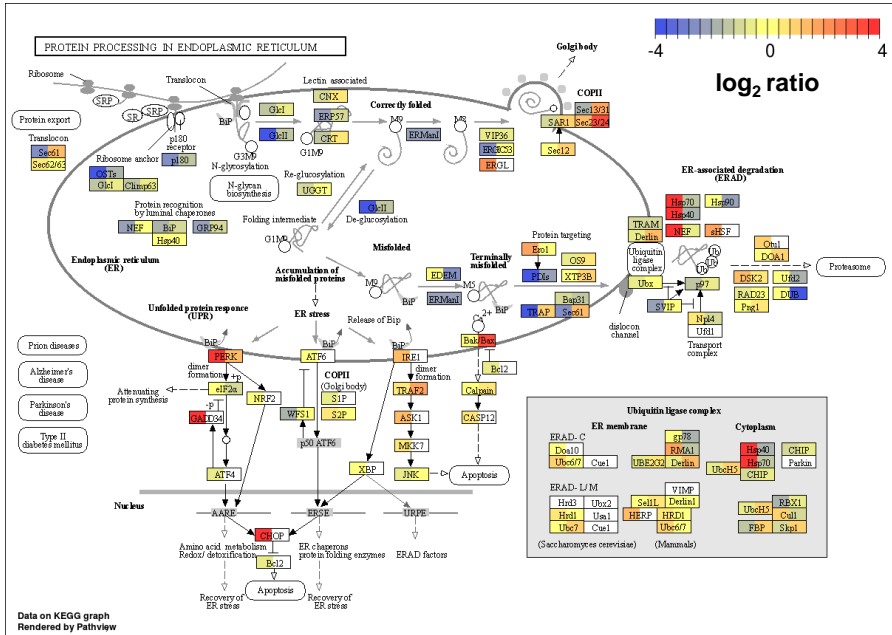

mRNA protein

**Supplementary Fig. 1. Opposing effects of HCoV-229E or MERS-CoV on ER stress genes at the mRNA and protein level.**

Projection of ratio values obtained from normalized transcriptomic (by RNA-seq) and proteomic (by LC-MS/MS) data derived in parallel from HuH7 cells infected for 24 h with HCoV-229E or MERS-CoV with a MOI=1 on the components of the KEGG pathway hsa04141 “protein processing in endoplasmic reticulum”. The left side of the boxes show mRNA values, right sides show protein values.

**a**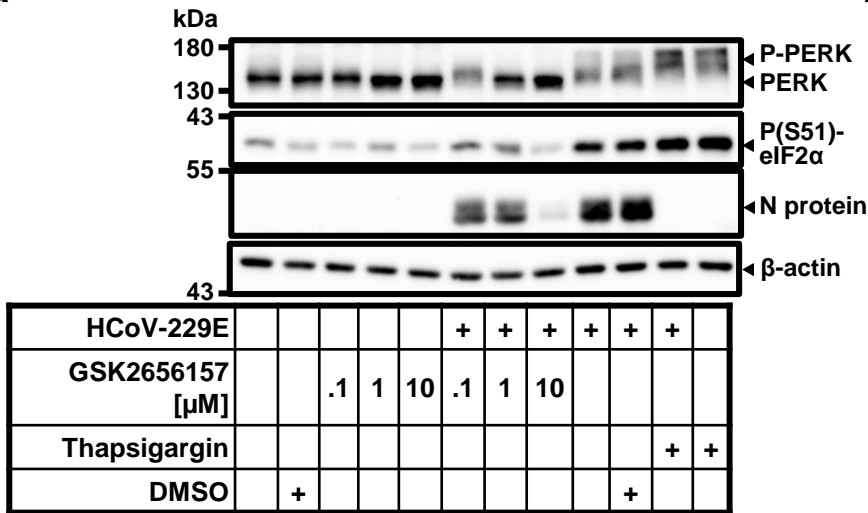**b**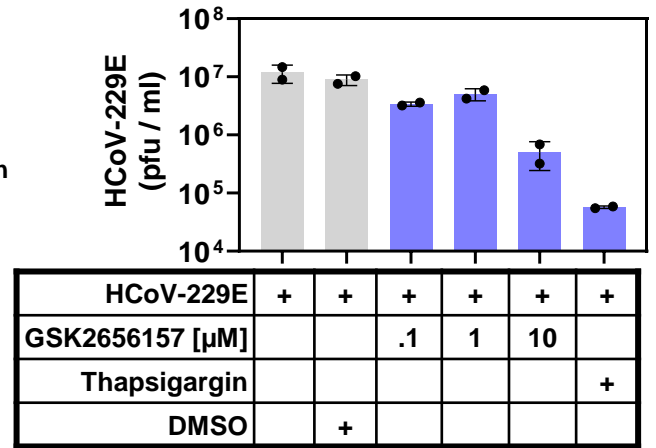**c**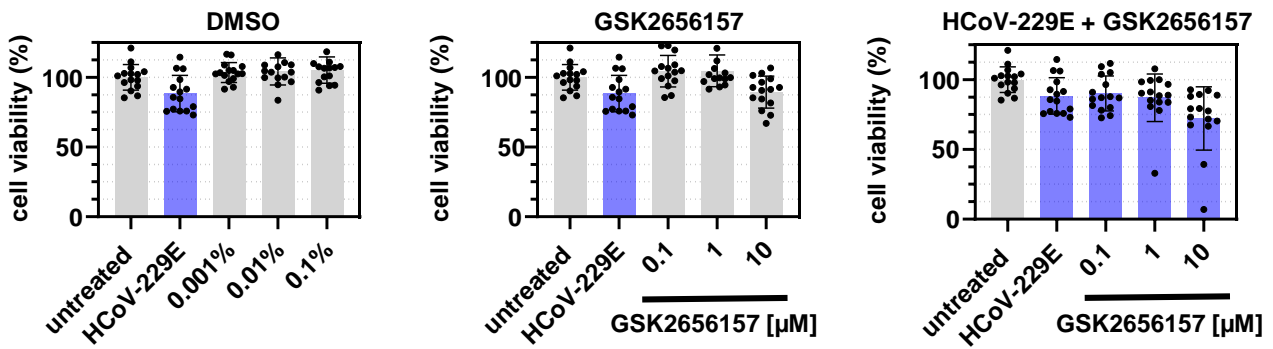**d**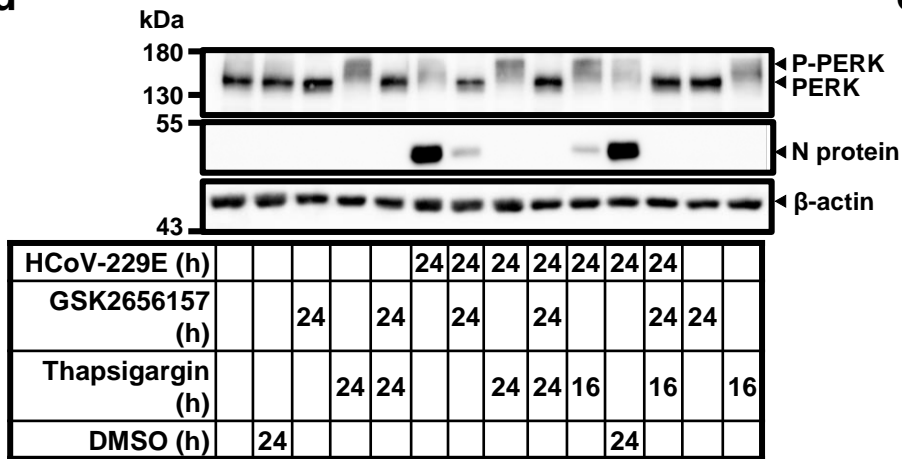**e**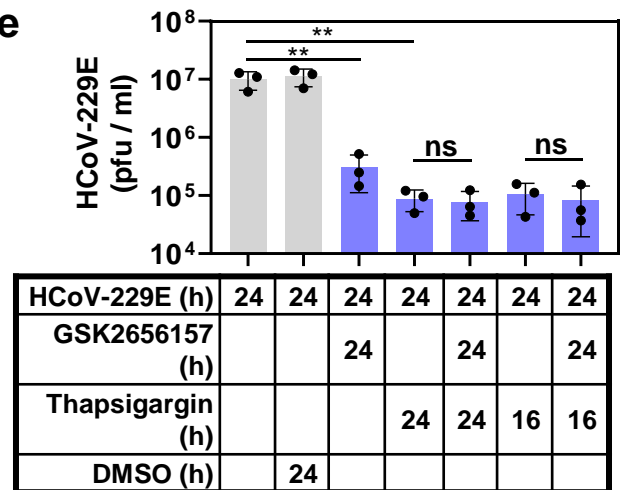**f**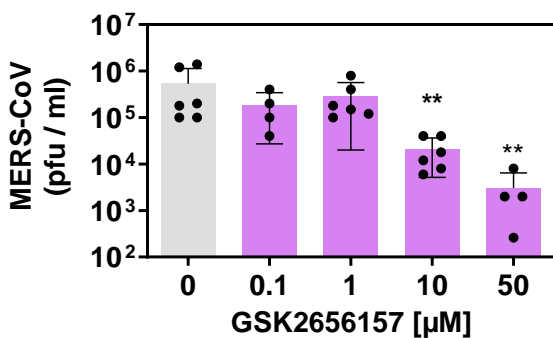

**Supplementary Fig. 2. PERK inhibition by GSK2656157 suppresses CoV replication.**

(a) HuH7 cells were pretreated with increasing concentrations of the PERK inhibitor GSK2656157 for 30 min or with solvent (DMSO), or were left untreated. Then, cells were infected with HCoV-229E (MOI = 1) as indicated. Cell extracts were analyzed by immunoblotting for the phosphorylation or expression of the indicated proteins (one representative out of two independent experiments).

(b) Viral titers in supernatants obtained from cells treated or infected as in (a) (two biologically independent experiments).

(c) Cell viabilities (by MTS assays) of cells treated as in (a). Data points show replicate determinations of five independent experiments.

(d, e) HuH7 cells were infected and treated with the indicated combinations of GSK2656157 (10  $\mu$ M) and thapsigargin (1  $\mu$ M). Activation or suppression of PERK and N protein levels were determined by immunoblotting of cell extracts. (d) shows one out of two representative immunoblot experiment, (e) shows viral titers of supernatants (three biologically independent experiments).

(f) Viral titers of supernatants from HuH7 cells infected with MERS-CoV in the presence or absence of increasing concentrations of GSK2656157 (four or more biologically independent experiments).

All bar graphs show means  $\pm$  s.d.; asterisks indicate p values (\*  $p \leq 0.05$ , \*\*  $p \leq 0.01$ , \*\*\*  $p \leq 0.001$ , \*\*\*\*  $p \leq 0.0001$ ) obtained by two-tailed unpaired t-tests (e) or Mann Withney tests (f).

**a**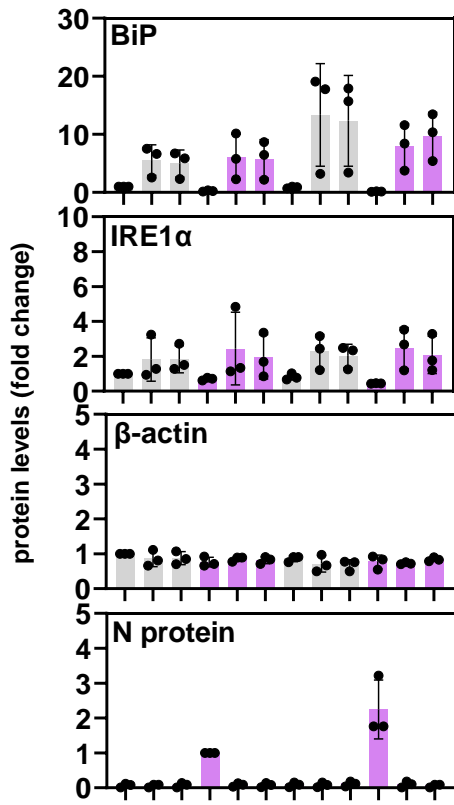

| MERS-CoV (h)            |   |    | 12 | 12 | 12 |    |   | 24 | 24 | 24 |
|-------------------------|---|----|----|----|----|----|---|----|----|----|
| Thapsigargin [ $\mu$ M] | 1 | .4 | 1  | .4 | 1  | .4 | 1 | .4 | 1  | .4 |

**b**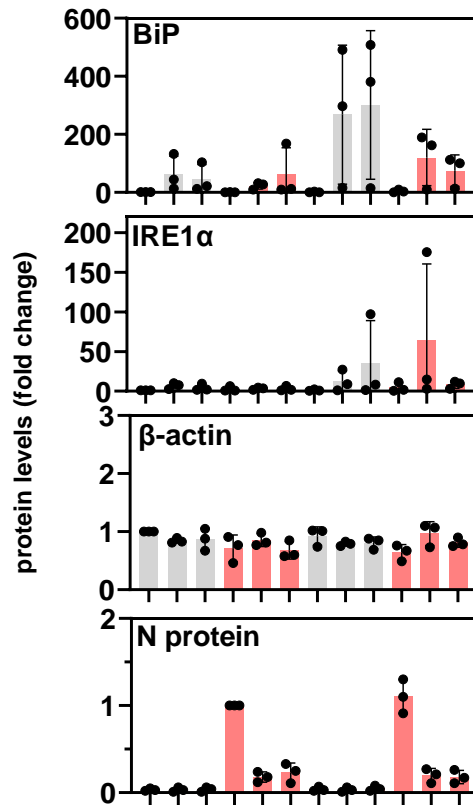

| SARS-CoV-2 (h)          |   |    | 12 | 12 | 12 |    |   | 24 | 24 | 24 |
|-------------------------|---|----|----|----|----|----|---|----|----|----|
| Thapsigargin [ $\mu$ M] | 1 | .4 | 1  | .4 | 1  | .4 | 1 | .4 | 1  | .4 |

**Supplementary Fig. 3. Thapsigargin suppresses MERS-CoV and SARS-CoV-2 N protein and upregulates BiP in infected cells.**

(a, b) show the quantification of replicate immunoblot experiments performed as shown in Fig. 4g and 4h. All bar graphs show means  $\pm$  s.d. (three biologically independent experiments).

**a**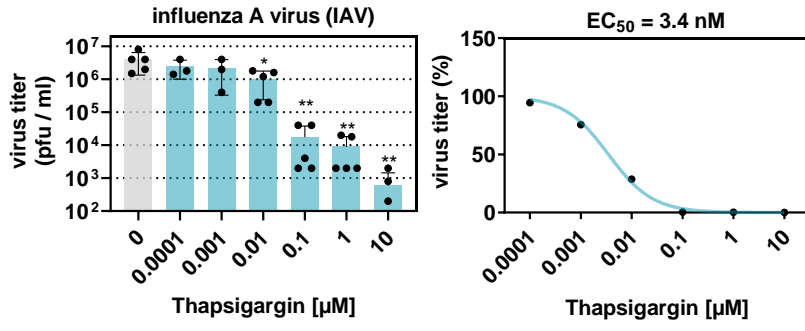**b**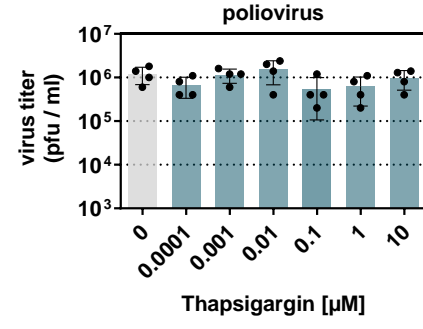



**Supplementary Fig. 4. Thapsigargin suppresses Influenza A virus but not poliovirus replication.**

(a) Shown are viral titers and the  $EC_{50}$  (for IAV) of A549 cells infected with IAV virus (strain A/Thailand/1(KAN-1)/2004, H5N1) at an MOI of 0.01 for 24 h (three or more biologically independent experiments).

(b) Viral titers of Vero E6 cells infected with poliovirus at an MOI of 0.1 for 24 h and treated with thapsigargin as indicated (four biologically independent experiments).

All bar graphs show means  $\pm$  s.d.; asterisks indicate p values (\*  $p \leq 0.05$ , \*\*  $p \leq 0.01$ , \*\*\*  $p \leq 0.001$ , \*\*\*\*  $p \leq 0.0001$ ) obtained by two-tailed unpaired t-tests.

**a**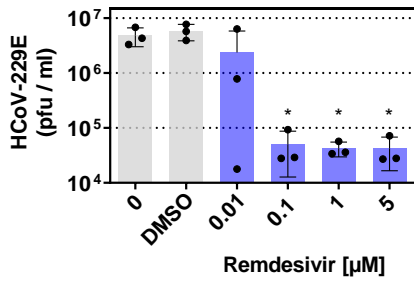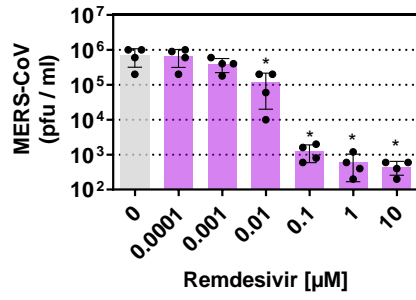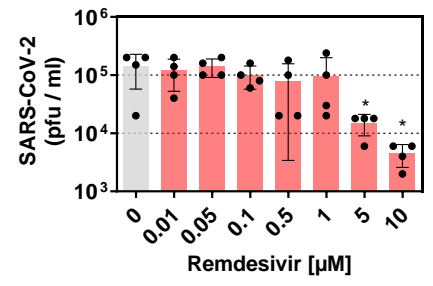**b**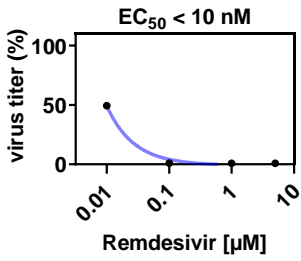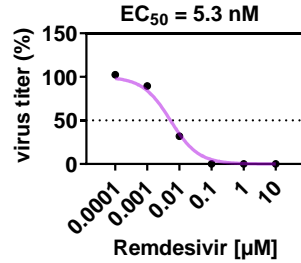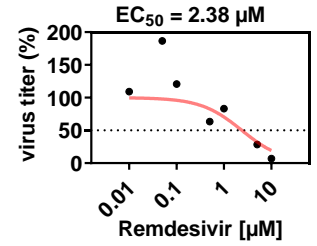**c**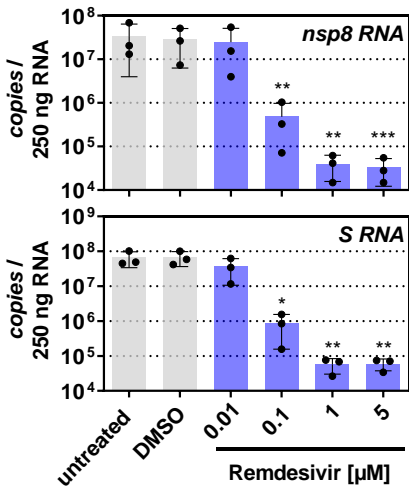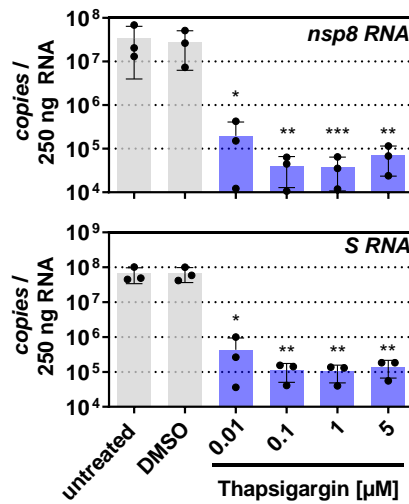**d**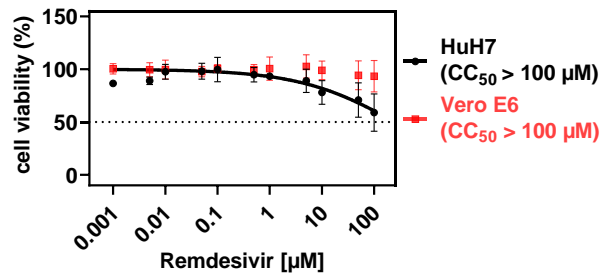**e**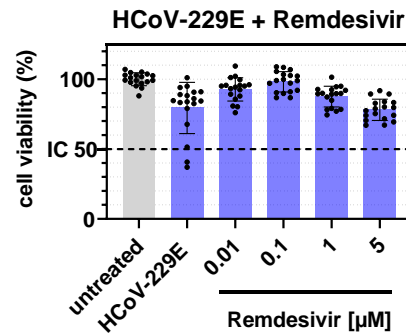**f**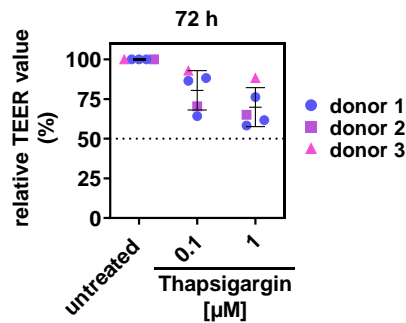

**Supplementary Fig. 5. Comparison of the antiviral effects of thapsigargin and remdesivir.**

(a, b) HuH7 cells infected with HCoV-229E (MOI of 1) or MERS-CoV (MOI of 0.5) or Vero E6 cells infected with SARS-CoV-2 (MOI of 0.5) for 24 h with an were treated with increasing concentrations of remdesivir and viral titers in the supernatants obtained from these cells (a) were used to calculate the EC<sub>50</sub> values shown in (b). Data represent three (HCoV-229E) or four (MERS-CoV, SARS-CoV-2) biologically independent experiments.

(c) Direct comparison of the effects of remdesivir or thapsigargin on the synthesis of viral RNAs in cells infected with HCoV-229E as described in (a) (three biologically independent experiments).

(d) Cytotoxicity of remdesivir in untreated HuH7 or Vero E6 cells. Data show CC<sub>50</sub> estimations obtained from two or more biologically independent experiments.

(e) Cytotoxicity of remdesivir in HuH7 cells infected with HCoV-229E (24 h, MOI of 1) as determined by MTS assays. Data points show replicate determinations representing six biologically independent experiments.

(f) Viability of differentiated NHBE cells treated for 72 h with two doses of thapsigargin was compared to untreated cells by TEER assay (three biologically independent experiments).

All bar graphs show means  $\pm$  s.d.; asterisks indicate p values (\*  $p \leq 0.05$ , \*\*  $p \leq 0.01$ , \*\*\*  $p \leq 0.001$ , \*\*\*\*  $p \leq 0.0001$ ) obtained by two-tailed unpaired t-tests.

## 12 h MERS-CoV

## 24 h MERS-CoV

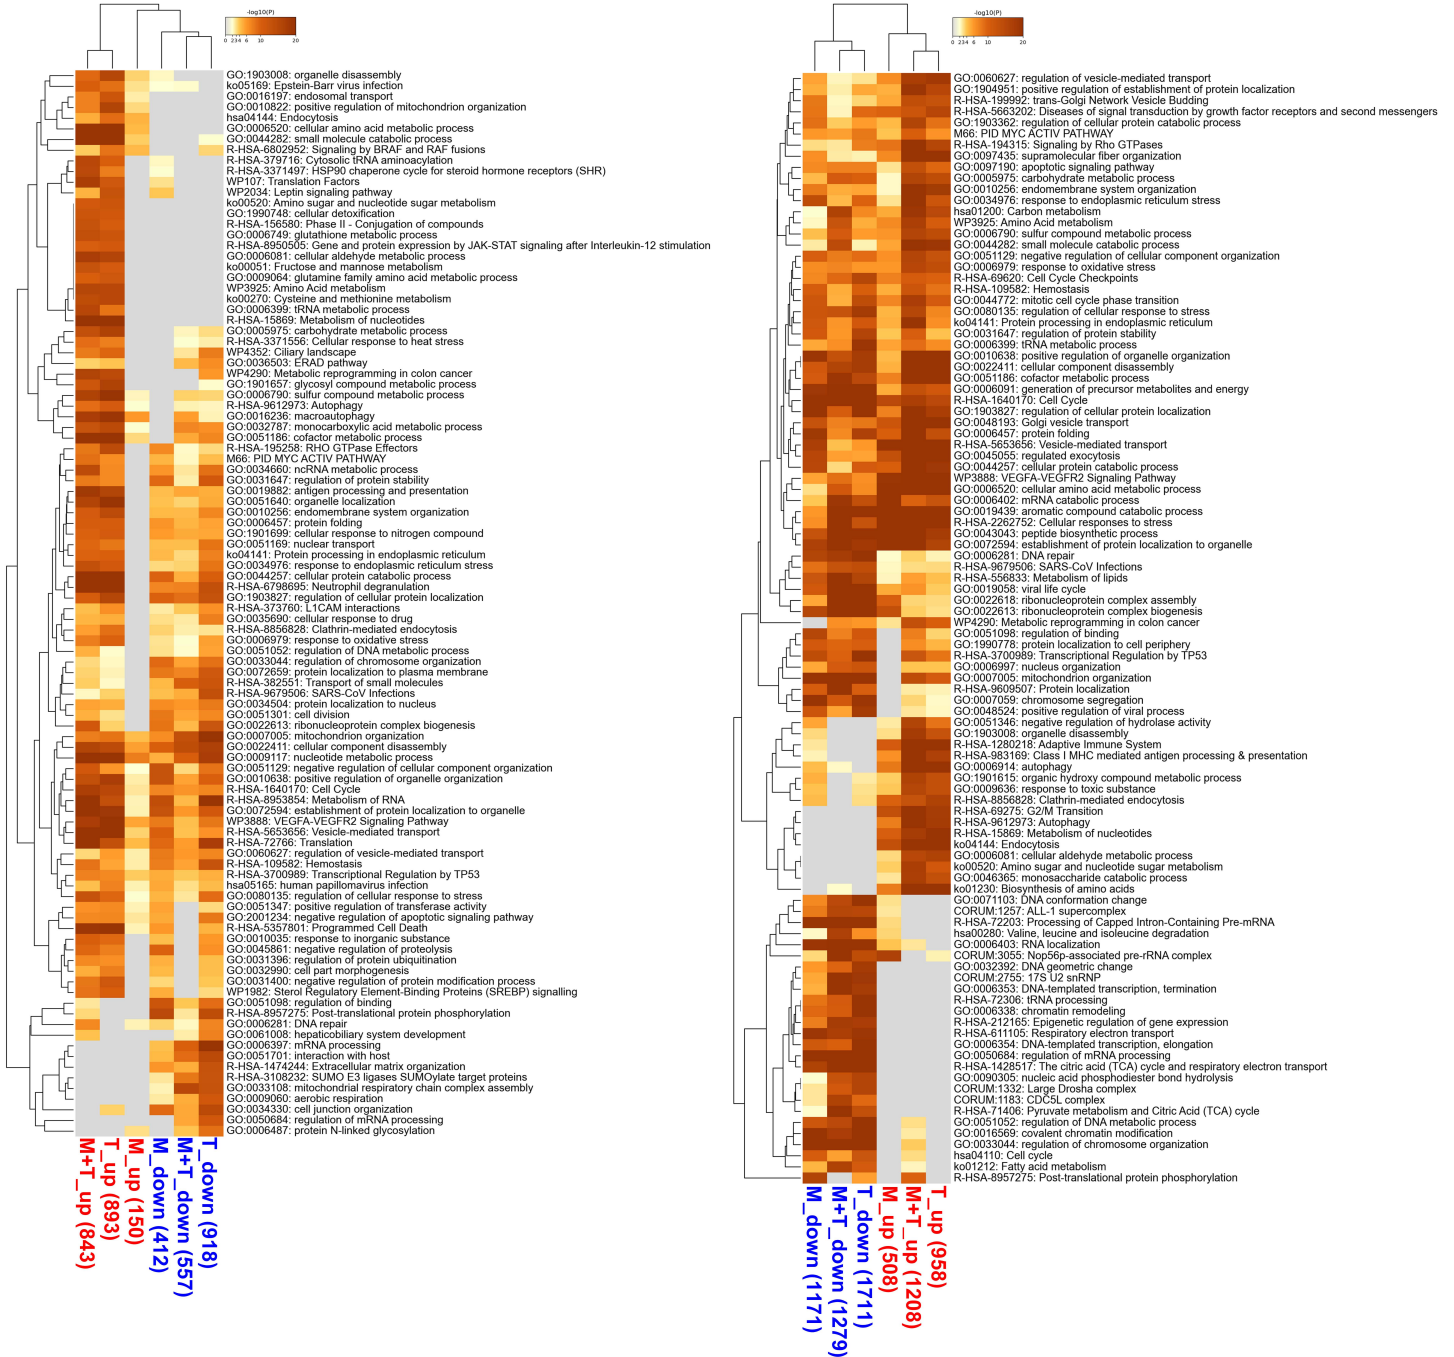

**Supplementary Fig. 6. Identification of deregulated cellular pathways in MERS-CoV-infected HuH7 cells.**

Top 100 overrepresented pathways containing up- or downregulated DEPs (ratio > 0, p value of  $-\log_{10}(p) \geq 1.3$ ) for the 12 h p.i. and 24 h p.i. time points of MERS-CoV-infected cells based on gene IDs derived from protein IDs. Blue and red colors indicate differentially expressed proteins as shown in Fig. 6a, b, e. See the legends of Fig. 6 and Methods for details.

## 12 h SARS-CoV-2

## 24 h SARS-CoV-2

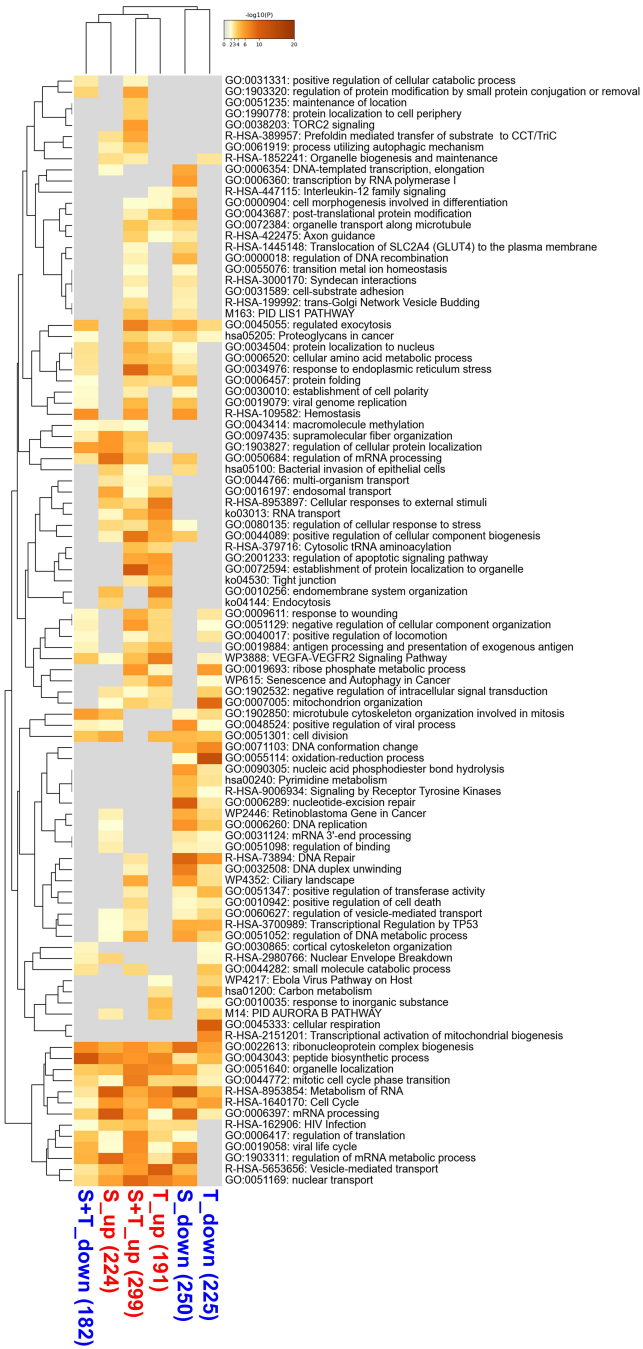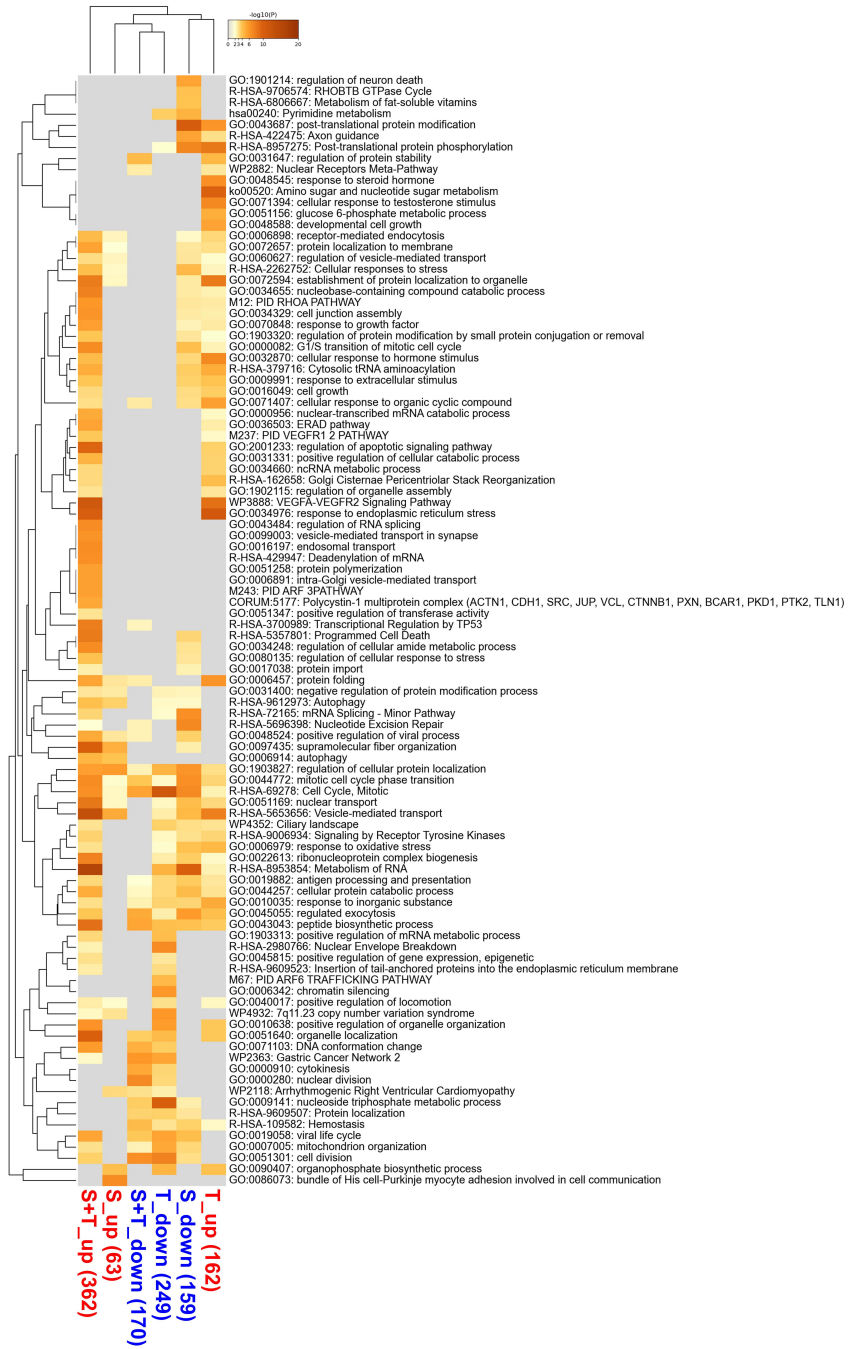

**Supplementary Fig. 7. Identification of deregulated cellular pathways in SARS-CoV-2-infected Vero E6 cells.**

Top 100 overrepresented pathways containing up- or downregulated DEPs (ratio > 0, p value of  $-\log_{10}(p) \geq 1.3$ ) for the 12 h p.i. and 24 h p.i. time points of SARS-CoV-2-CoV-infected cells based on gene IDs derived from protein IDs. Blue and red colors indicate differentially expressed proteins as shown in Fig. 6c, d, e. See the legends of Fig. 6 and Methods for details.

a

| condition    | time | GO            | description                                            | DEPs↑ | DEPs↓  |
|--------------|------|---------------|--------------------------------------------------------|-------|--------|
| MERS-CoV     | 12h  | GO:0009117    | nucleotide metabolic process                           | -7.9  | -5.0   |
|              |      | GO:0016236    | macropinocytosis                                       | -5.9  | -      |
|              |      | GO:0022411    | cellular component disassembly                         | -5.7  | -10.1  |
|              |      | WP3888        | VEGFA-VEGFR2 Signaling Pathway                         | -5.4  | -8.1   |
|              |      | hsa04144      | Endocytosis                                            | -4.8  | -      |
| MERS-CoV     | 24h  | R-HSA-8957275 | Post-translational protein phosphorylation             | -     | -14.8  |
|              |      | R-HSA-8953854 | Metabolism of RNA                                      | -     | -13.9  |
|              |      | GO:0051129    | negative regulation of cellular component organization | -     | -13.0  |
|              |      | GO:0072594    | establishment of protein localization to organelle     | -     | -13.0  |
|              |      | GO:0010638    | positive regulation of organelle organization          | -     | -12.8  |
| MERS-CoV     | 24h  | R-HSA-2262752 | Cellular responses to stress                           | -33.4 | -6.6   |
|              |      | GO:0043043    | peptide biosynthetic process                           | -32.5 | -13.0  |
|              |      | GO:0006402    | mRNA catabolic process                                 | -28.7 | -3.9   |
|              |      | GO:0019439    | aromatic compound catabolic process                    | -27.2 | -6.2   |
|              |      | GO:0006520    | cellular amino acid metabolic process                  | -22.8 | -3.2   |
| MERS-CoV     | 24h  | R-HSA-72203   | Processing of Capped Intron-Containing Pre-mRNA        | -3.3  | -32.5  |
|              |      | GO:1903827    | regulation of cellular protein localization            | -7.7  | -24.2  |
|              |      | GO:0050684    | regulation of mRNA processing                          | -     | -24.1  |
|              |      | R-HSA-1640170 | Cell Cycle                                             | -14.8 | -23.8  |
|              |      | GO:0007005    | mitochondrion organization                             | -     | -22.8  |
| SARS-CoV-2   | 12h  | GO:0006397    | mRNA processing                                        | -11.0 | -9.2   |
|              |      | R-HSA-8953854 | Metabolism of RNA                                      | -10.1 | -12.7  |
|              |      | GO:1903311    | regulation of mRNA metabolic process                   | -9.2  | -8.7   |
|              |      | GO:0050684    | regulation of mRNA processing                          | -8.7  | -3.9   |
|              |      | GO:0043043    | peptide biosynthetic process                           | -7.0  | -      |
| SARS-CoV-2   | 24h  | R-HSA-8953854 | Metabolism of RNA                                      | -10.1 | -12.7  |
|              |      | GO:0006289    | nucleotide-excision repair                             | -10.1 | -10.0  |
|              |      | R-HSA-73894   | DNA Repair                                             | -     | -9.6   |
|              |      | GO:0006397    | mRNA processing                                        | -11.0 | -9.2   |
|              |      | GO:0022613    | ribonucleoprotein complex biogenesis                   | -5.2  | -9.0   |
| SARS-CoV-2   | 24h  | GO:0006073    | .His cell-Purkinje myocyte adhesion in communication   | -6.83 | -      |
|              |      | GO:1903827    | regulation of cellular protein localization            | -5.9  | -6.3   |
|              |      | R-HSA-5653656 | Vesicle-mediated transport                             | -5.2  | -4.6   |
|              |      | GO:0097435    | supramolecular fiber organization                      | -5.0  | -      |
|              |      | GO:0090407    | organophosphate biosynthetic process                   | -4.19 | -      |
| SARS-CoV-2   | 24h  | GO:0043687    | post-translational protein modification                | -     | -10.5  |
|              |      | R-HSA-8953854 | Metabolism of RNA                                      | -     | -10.0  |
|              |      | R-HSA-8957275 | Post-translational protein phosphorylation             | -     | -7.2   |
|              |      | R-HSA-5696398 | Nucleotide Excision Repair                             | -     | -7.1   |
|              |      | R-HSA-69278   | Cell Cycle, Mitotic                                    | -     | -7.0   |
| Thapsigargin | 12h  | GO:0006520    | cellular amino acid metabolic process                  | -49.0 | -      |
|              |      | GO:0051186    | cofactor metabolic process                             | -43.3 | -7.2   |
|              |      | R-HSA-5653656 | Vesicle-mediated transport                             | -42.7 | -6.4   |
|              |      | GO:0009117    | nucleotide metabolic process                           | -38.9 | -17.6  |
|              |      | R-HSA-5357901 | Programmed Cell Death                                  | -28.9 | -4.8   |
| Thapsigargin | 12h  | GO:0006397    | mRNA processing                                        | -13.7 | -24.7  |
|              |      | R-HSA-8953854 | Metabolism of RNA                                      | -13.7 | -23.7  |
|              |      | GO:0007005    | mitochondrion organization                             | -8.5  | -20.5  |
|              |      | R-HSA-72766   | Translation                                            | -13.5 | -17.5  |
|              |      | GO:0009117    | nucleotide metabolic process                           | -38.9 | -17.5  |
| Thapsigargin | 24h  | R-HSA-5653656 | Vesicle-mediated transport                             | -59.1 | -6.0   |
|              |      | GO:0006520    | cellular amino acid metabolic process                  | -34.5 | -6.8   |
|              |      | GO:0051186    | cofactor metabolic process                             | -34.5 | -14.7  |
|              |      | ko04144       | Endocytosis                                            | -31.1 | -      |
|              |      | WP3888        | VEGFA-VEGFR2 Signaling Pathway                         | -30.9 | -6.7   |
| Thapsigargin | 24h  | R-HSA-72203   | Processing of Capped Intron-Containing Pre-mRNA        | -     | -100.0 |
|              |      | GO:0022613    | ribonucleoprotein complex biogenesis                   | -3.1  | -71.0  |
|              |      | GO:0006403    | RNA localization                                       | -     | -49.6  |
|              |      | GO:0050684    | regulation of mRNA processing                          | -     | -46.6  |
|              |      | R-HSA-1640170 | Cell Cycle                                             | -14.9 | -40.6  |
| Thapsigargin | 12h  | R-HSA-5653656 | Vesicle-mediated transport                             | -10.4 | -      |
|              |      | R-HSA-8953897 | Cellular responses to external stimuli                 | -8.1  | -      |
|              |      | GO:0016256    | endomembrane system organization                       | -8.0  | -      |
|              |      | WP3888        | VEGFA-VEGFR2 Signaling Pathway                         | -7.8  | -      |
|              |      | GO:0051169    | nuclear transport                                      | -7.4  | -      |
| Thapsigargin | 12h  | GO:0055114    | oxidation-reduction process                            | -     | -13.5  |
|              |      | GO:0045333    | cellular respiration                                   | -     | -10.2  |
|              |      | GO:0007005    | mitochondrion organization                             | -3.1  | -9.4   |
|              |      | GO:0071103    | DNA conformation change                                | -     | -7.1   |
|              |      | R-HSA-2151201 | Transcriptional activation of mitochondrial biogenesis | -     | -6.9   |
| Thapsigargin | 24h  | GO:0034976    | response to endoplasmic reticulum stress               | -11.3 | -      |
|              |      | ko00520       | Amino sugar and nucleotide sugar metabolism            | -9.8  | -      |
|              |      | WP3888        | VEGFA-VEGFR2 Signaling Pathway                         | -8.9  | -      |
|              |      | R-HSA-8957275 | Post-translational protein phosphorylation             | -8.2  | -      |
|              |      | GO:0072594    | establishment of protein localization to organelle     | -8.2  | -      |
| Thapsigargin | 24h  | R-HSA-69278   | Cell Cycle, Mitotic                                    | -     | -11.9  |
|              |      | GO:0009141    | nucleoside triphosphate metabolic process              | -     | -10.2  |
|              |      | GO:0051301    | cell division                                          | -     | -7.44  |
|              |      | R-HSA-2980766 | Nuclear Envelope Breakdown                             | -     | -6.9   |
|              |      | WP4932        | 7q11.23 copy number variation syndrome                 | -     | -6.1   |

top10 pathways

- DNA
- RNA
- metabolism
- localization

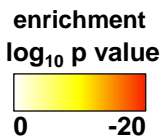

b

|                                         | GO            | description                                         | virus |       | Thapsigargin |       |
|-----------------------------------------|---------------|-----------------------------------------------------|-------|-------|--------------|-------|
|                                         |               |                                                     | DEPs↑ | DEPs↓ | DEPs↑        | DEPs↓ |
| Thapsigargin (52)                       | GO:1901657    | glycosyl compound metabolic process                 | -     | -     | -16.7        | -     |
|                                         | ko00270       | Cysteine and methionine metabolism                  | -     | -     | -15.2        | -     |
|                                         | GO:0032787    | monocarboxylic acid metabolic process               | -     | -     | -14.7        | -6.7  |
|                                         | GO:0046365    | monosaccharide catabolic process                    | -     | -     | -13.5        | -     |
|                                         | GO:0006749    | glutathione metabolic process                       | -     | -     | -12.1        | -     |
|                                         | GO:0009064    | glutamine family amino acid metabolic process       | -     | -     | -11.7        | -     |
|                                         | GO:1909748    | cellular detoxification                             | -     | -     | -11.5        | -     |
|                                         | R-HSA-8950505 | JAK-STAT signaling after Interleukin-12 stimulation | -     | -     | -11.4        | -     |
|                                         | ko00051       | Fructose and mannose metabolism                     | -     | -     | -11.0        | -     |
|                                         | R-HSA-156580  | Phase II - Conjugation of compounds                 | -     | -     | -10.5        | -     |
| Thapsigargin, MERS-CoV, SARS-CoV-2 (36) | CORUM:1332    | Large Drosha complex                                | -     | -     | -15.9        | -     |
|                                         | R-HSA-71406   | Pyruvate metabolism and Citric Acid (TCA) cycle     | -     | -     | -13.6        | -     |
|                                         | GO:0055114    | oxidation-reduction process                         | -     | -     | -13.5        | -     |
|                                         | GO:0033108    | mitochondrial respiratory chain complex assembly    | -     | -     | -12.9        | -     |
|                                         | R-HSA-3108232 | SUMO E3 ligases SUMOylate target proteins           | -     | -     | -12.6        | -     |
|                                         | GO:0009060    | aerobic respiration                                 | -     | -     | -11.5        | -     |
|                                         | GO:0009141    | nucleoside triphosphate metabolic process           | -     | -     | -10.2        | -     |
|                                         | GO:0045333    | cellular respiration                                | -     | -     | -10.2        | -     |
|                                         | CORUM:1183    | CDCSL complex                                       | -     | -     | -9.3         | -     |
|                                         | GO:0061008    | hepaticobiliary system development                  | -     | -     | -7.5         | -     |
| Thapsigargin, MERS-CoV, SARS-CoV-2 (36) | R-HSA-2262752 | Cellular responses to stress                        | -33.4 | -6.6  | -24.6        | -12.8 |
|                                         | GO:0043043    | peptide biosynthetic process                        | -32.5 | -13.0 | -17.8        | -30.4 |
|                                         | R-HSA-5653656 | Vesicle-mediated transport                          | -20.2 | -17.1 | -59.1        | -6.0  |
|                                         | R-HSA-1640170 | Cell Cycle                                          | -14.8 | -23.6 | -14.9        | -40.6 |
|                                         | GO:0045055    | regulated exocytosis                                | -13.5 | -15.3 | -20.2        | -5.5  |
|                                         | GO:0022613    | ribonucleoprotein complex biogenesis                | -13.4 | -15.5 | -3.1         | -71.0 |
|                                         | ko04144       | Endocytosis                                         | -13.4 | -     | -31.1        | -     |
|                                         | GO:0006397    | mRNA processing                                     | -11.0 | -9.2  | -            | -     |
|                                         | GO:0044257    | cellular protein catabolic process                  | -10.3 | -15.2 | -19.0        | -11.1 |
|                                         | GO:0006457    | protein folding                                     | -10.3 | -18.7 | -13.4        | -17.0 |
| Thapsigargin, MERS-CoV, SARS-CoV-2 (36) | GO:1903827    | regulation of cellular protein localization         | -7.7  | -24.2 | -17.3        | -20.1 |
|                                         | GO:0050684    | regulation of mRNA processing                       | -     | -24.1 | -            | -46.6 |
|                                         | R-HSA-1640170 | Cell Cycle                                          | -14.8 | -23.6 | -14.9        | -40.6 |
|                                         | GO:0007005    | mitochondrion organization                          | -     | -22.6 | -11.0        | -27.1 |
|                                         | GO:0006457    | protein folding                                     | -10.3 | -18.7 | -13.4        | -17.0 |
|                                         | R-HSA-5653656 | Vesicle-mediated transport                          | -20.2 | -17.1 | -59.1        | -6.0  |
|                                         | R-HSA-8957275 | Post-translational protein phosphorylation          | -     | -16.3 | -            | -5.7  |
|                                         | GO:0022613    | ribonucleoprotein complex biogenesis                | -13.4 | -15.5 | -3.1         | -71.0 |
|                                         | GO:0045055    | regulated exocytosis                                | -13.5 | -15.3 | -20.2        | -5.5  |
|                                         | GO:0044257    | cellular protein catabolic process                  | -10.3 | -15.2 | -19.0        | -11.1 |

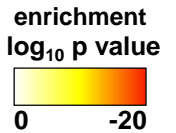



**Supplementary Fig. 8. Top pathways regulated by MERS-CoV, SARS-CoV-2 or thapsigargin.**

(a) Top ten enriched pathways containing up- or downregulated DEPs extracted from the 100 enriched deregulated pathways shown in Fig. S6 / Fig. S7. Colors indicate highly common categories.

(b) Top 20 pathways enriched with thapsigargin alone or jointly by MERS-CoV, SARS-CoV-2 and thapsigargin according to the Venn diagram shown in Fig. 6f. See the legends of Fig. 6 and Methods for details.



**Supplementary Fig. 9. Projection of thapsigargin effects on protein levels of pathway KEGG hsa04141.**

Mean ratio values of all pathway components measured by LC-MS/MS in untreated cells and 24 h p.i. were projected on the KEGG hsa04141 pathway map (left graphs). The right graphs show the corresponding changes imposed by thapsigargin treatment of infected cells.



**Supplementary Fig. 10. Effects of bafilomycin A<sub>1</sub> on the viability of HCoV-229E-infected and thapsigargin-treated HuH7 cells.**

Experiments were performed as described in the legend of Fig. 8. Cell viability was determined by MTS assay. Data points show replicate determinations representing three (28 h bafilomycin A<sub>1</sub> treatment conditions) or four (16 h bafilomycin A<sub>1</sub> treatment conditions) biologically independent experiments.

The bar graph shows means  $\pm$  s.d.; asterisks indicate p values (\*  $p \leq 0.05$ , \*\*  $p \leq 0.01$ , \*\*\*  $p \leq 0.001$ , \*\*\*\*  $p \leq 0.0001$ ) obtained by two-tailed unpaired t-tests.

**a****HuH7**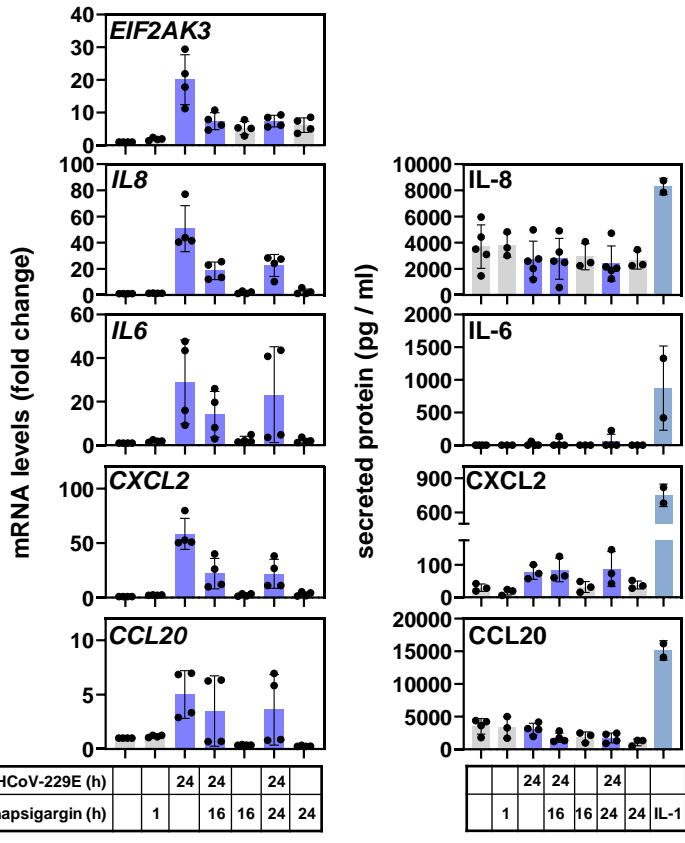**b****MRC-5**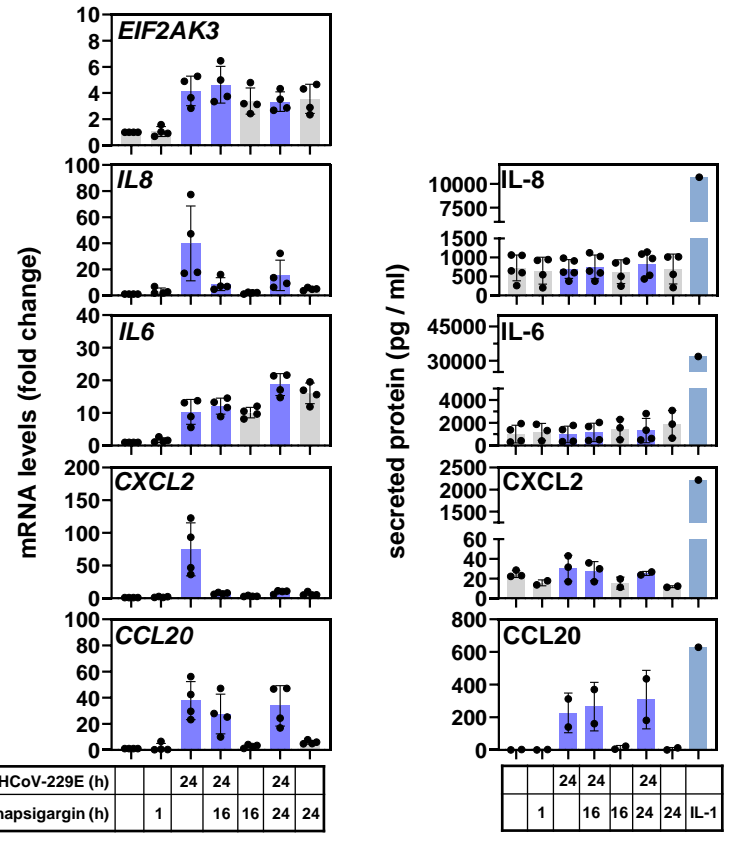

**Supplementary Fig. 11. Analysis of inflammatory host cell transcripts showing thapsigargin-independent uncoupling of mRNA and protein levels in HCoV-229E-infected cells.**

HuH7 (a) or MRC-5 (b) cells were infected as described in Fig. 2b. Total RNA was used to analyze expression of inflammatory transcripts by RT-qPCR (left graphs) and the secretion of the corresponding proteins by ELISA (right graphs). Additionally, expression of the *EIF2AK3* mRNA encoding the PERK protein kinase was determined. PERK protein levels of HuH7 cells are shown in Fig. 2e-f. All bar graphs show means  $\pm$  s.d.. Data points show individual values from two or more biologically independent experiments with the exception of IL-1 treatments which were used as positive controls for one or two experiments as indicated.

Table 1: Commercial Taqman assays used for RT-qPCR

| transcript                     | length of PCR product (bp) | assay ID      | source                                        |
|--------------------------------|----------------------------|---------------|-----------------------------------------------|
| <i>GUSB</i>                    | 81                         | Hs99999908_m1 | Applied Biosystems / Thermo Fisher Scientific |
| <i>IL6</i>                     | 95                         | Hs00174131_m1 | Applied Biosystems / Thermo Fisher Scientific |
| <i>IL8</i><br>( <i>CXCL8</i> ) | 101                        | Hs00174103_m1 | Applied Biosystems / Thermo Fisher Scientific |
| <i>CXCL2</i>                   | 68                         | Hs00236966_m1 | Applied Biosystems / Thermo Fisher Scientific |
| <i>CCL20</i>                   | 81                         | Hs00171125_m1 | Applied Biosystems / Thermo Fisher Scientific |

Table 2: Additional primers designed for RT-qPCR

| transcript                | forward sequence             | reverse sequence                 |
|---------------------------|------------------------------|----------------------------------|
| <i>EIF2AK3</i>            | 5'-AGAGATTGAGACTGCGTGGC-3'   | 5'-TCCCAAATACCTCTGGTTTGCT-3'     |
| <i>HCoV-229E S RNA</i>    | 5'-TTTCAGGTGATGCTCACATACC-3' | 5'-ACAAACTCACGAACTGTCTTAGG-3'    |
| <i>HCoV-229E nsp8 RNA</i> | 5'-GCTGTTGCAAATGGTTCCTCAC-3' | 5'-GATGCACATTCTTACCATCATTATCC-3' |



**Supplementary Table 1. List of all commercial Taqman assays and primers used in this study.**
