# Supplementary material for: Multi-level inhibition of coronavirus replication by chemical ER stress
Source: PubMed Central journal article supplement (PMC8452654; doi:10.1038/s41467-021-25551-1), 2021-09-20
Supplement: 41467_2021_25551_MOESM3_ESM.pdf [file 41467_2021_25551_MOESM3_ESM.pdf]

The full content of this file cannot be displayed with your current PDF viewer. Please update to the latest possible version to view this document.
